# Supplementary material
Source: publisher figshare collection journal article supplement (https://frontiersin.figshare.com/ndownloader/files/22229577)
Supplement: Supplementary file [file 22229577]

## Supplementary Material

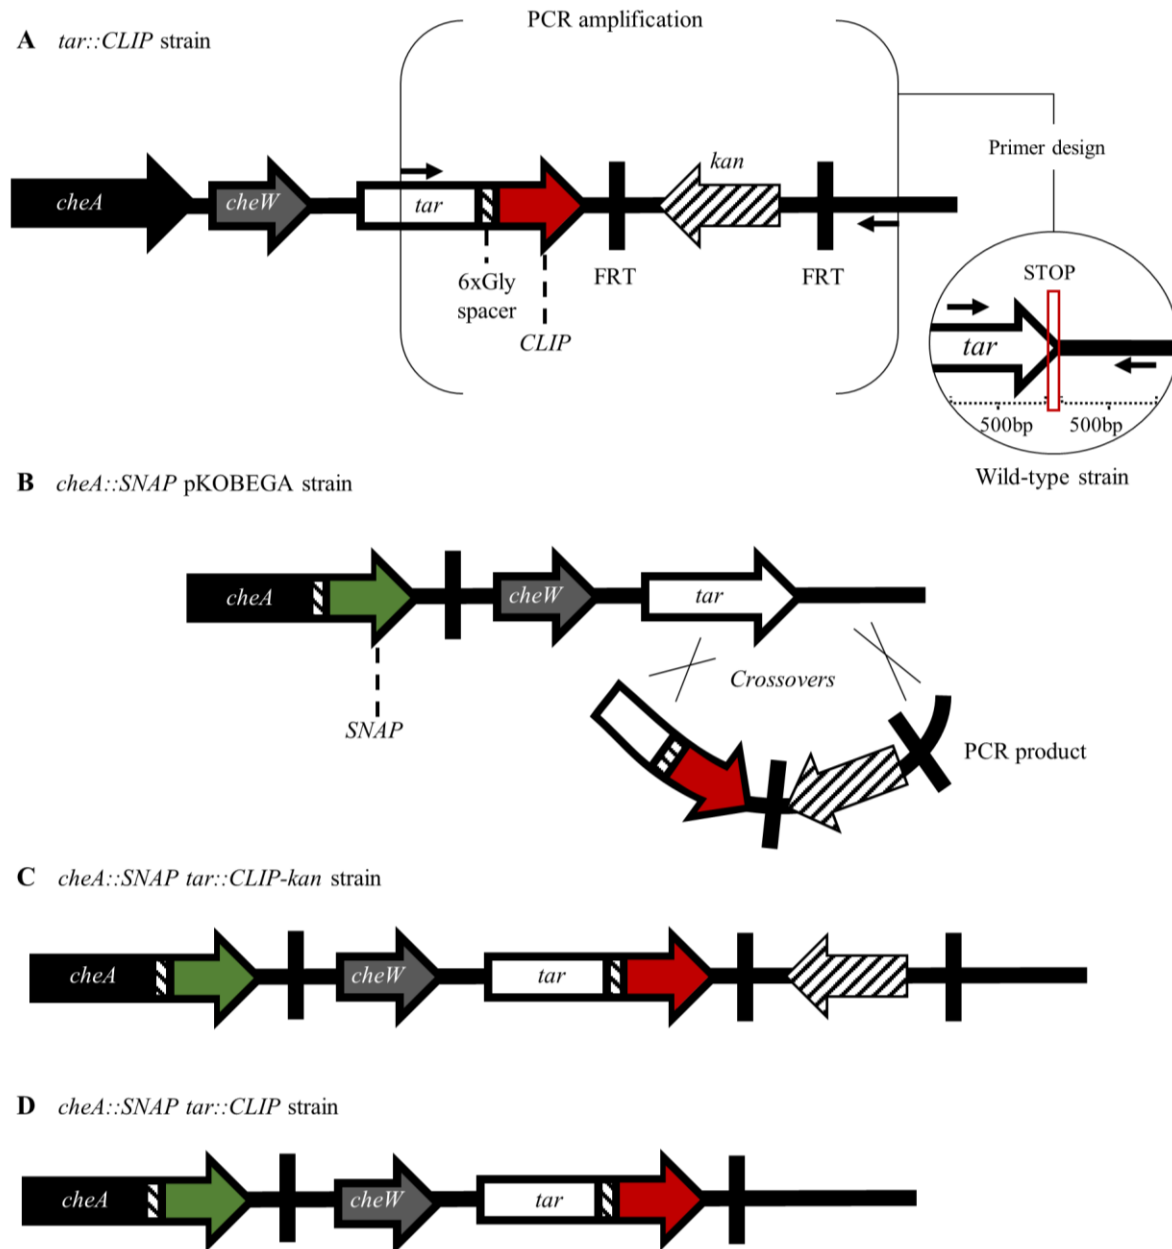

**Supplementary Figure 1. Schematic representation of the *S. enterica* *cheA::SNAP tar::CLIP* strain construct obtained using the  $\lambda$  Red recombinase-based gene replacement method. (A) *S. enterica* *tar::CLIP* was constructed by introducing the tag between the last nucleotide and the STOP triplet of the *tar* gene. To construct the double-tagged strain, a PCR with primers amplifying 500 bp upstream and downstream of the *tar* STOP codon was performed. (B) The PCR product was electroporated into the *S. enterica* *cheA::SNAP* pKOBEGA strain and double recombination allowed the tagging of *tar* with CLIP, generating the strain (C) *S. enterica* *cheA::SNAP tar::CLIP-kan*. (D) Kanamycin resistance was removed using pCP20, yielding the *cheA::SNAP tar::CLIP* strain.**
